1 **Hypoxic Microenvironment Promotes PTBP1 Lactonization**  
2 **and IGF2BP2 Read Defects Mediate the Development of**  
3 **Preeclampsia**

4 **Hongmei Qu<sup>1#</sup>, Xiaoyan Li<sup>1#</sup>, Qian Li<sup>2#</sup>, Xiaoming Yang, Yan Feng<sup>3</sup>, Li Yu<sup>4</sup>,**  
5 **Liping Qu<sup>1</sup>, Linsong Mu<sup>5\*</sup>, Yanfen Zou<sup>1\*</sup>, Yongli Chu<sup>1\*</sup>**

6 <sup>1</sup>Departments of Obstetrics and Gynecology, The Affiliated Yantai Yuhuangding  
7 Hospital of Qingdao University, Yantai, Shandong 264000, P.R. China

8 <sup>2</sup>Departments of Scientific Research, The Affiliated Yantai Yuhuangding Hospital of  
9 Qingdao University, Yantai, Shandong 264000, P.R. China

10 <sup>3</sup>Department of clinical nutrition, The Affiliated Yantai Yuhuangding Hospital of  
11 Qingdao University, Yantai, Shandong 264000, P.R. China

12 <sup>4</sup>Department of Central Ward Operating Room, The Affiliated Yantai Yuhuangding  
13 Hospital of Qingdao University, Yantai, Shandong 264000, P.R. China

14 <sup>5</sup>Department of General Surgery and Pediatric Surgery, The Affiliated Yantai  
15 Yuhuangding Hospital of Qingdao University, Yantai, Shandong 264000, P.R. China

16 <sup>#</sup>Contribute equally as co-first author.

17 **\*Corresponding author:**

18 Linsong Mu, [yhdyym163.com](mailto:yhdyym163.com)

19 Yanfen Zou, [zouyanfen2011@163.com](mailto:zouyanfen2011@163.com)

20 Yongli Chu, [ccwish@163.com](mailto:ccwish@163.com)

21 **Abstract**

22 **Objective:** As an idiopathic hypertensive disorder of pregnancy, pre-eclampsia (PE)  
23 remains a major cause of maternal and neonatal morbidity and mortality, with no  
24 effective strategy for causal treatment.

25 **Methods:** This study was performed by downloading the Gene Expression Omnibus  
26 (GEO) database (<http://www.ncbi.nlm.nih.gov/geo/>) based on the GSE173193 dataset,  
27 including single-cell sequencing data from placental samples of two PE patients and  
28 two normal controls. Placental cell subpopulations and their transcriptional  
29 heterogeneity were compared between PE and healthy pregnancies, and the  
30 mechanisms of PE cell dynamics in the hypoxic microenvironment were confirmed  
31 by in vitro experiments.

32 **Results:** In this study, we constructed a large-scale single-cell transcriptome  
33 ecological landscape of 26,416 cells from healthy pregnant and PE patients placenta  
34 and further identified a PE-specific CSNK2B-positive subpopulation of chorionic  
35 villous trophoblast (EVT) cells. Specifically, this study revealed that the EVT  
36 subpopulation PTBP1 was inactivated by lactonization in the hypoxic  
37 microenvironment, resulting in low expression of the N<sup>6</sup>-methyladenosine (m<sup>6</sup>A)  
38 reading protein IGF2BP2. On the basis of this, low expression of IGF2BP2 inhibits  
39 mitochondrial autophagy, causes the accumulation of damaged mitochondria,  
40 exacerbates lactic acid accumulation while inducing EVT apoptosis on the one hand.  
41 In particular, hypoxia may initially promote oxidative stress through the production of  
42 mitochondrial reactive oxygen species. on the other hand, it inhibits EVT adherent  
43 spot signaling, decreases EVT invasive ability, leads to impaired placental spiral  
44 vessel recast, and promotes PE disease process. In addition, there are interactions  
45 between abnormal metabolic signaling of PE-specific EVT subpopulations and  
46 microenvironmental immune cells, which activate metabolic inflammation.

47 **Conclusion:** The present study not only provides a new cell biological and genetic  
48 basis for elucidating the pathogenesis of PE, but also contributes to the design of an  
49 allopathic treatment strategy for PE.

50 **Keywords:** single-cell transcriptomics, preeclampsia, chorionic trophoblast, hypoxia,  
51 oxidative stress, mitochondrial autophagy

## 52 **Introduction**

53 Pre-eclampsia (PE) is a hypertensive disorder specific to pregnancy and a major  
54 cause of maternal and neonatal morbidity and mortality (4%-5%), manifesting as  
55 new-onset hypertension and proteinuria or end-organ damage after 20 weeks of  
56 gestation (1-3). Globally, PE affects about 2-8% of pregnancies, killing about 76,000  
57 pregnant women and 500,000 fetuses each year, and even causing up to 20% of  
58 preterm birth events (4-6). However, as of today, PE remains incurable, with blood  
59 pressure control being the main clinical intervention and placental delivery remaining  
60 the only definitive treatment (7).

61 To date, the pathogenesis of PE is not fully understood, but abnormal placental  
62 development plays an important role in the disease (8). During the early stages of  
63 conception, trophoblast cells differentiate into cytotrophoblast cells (CTB) and  
64 syncytial trophoblast cells (ST), followed by the formation of extravillous trophoblast  
65 (EVT) from CTB. The EVT is able to invade the endometrium and remodel the uterine  
66 spiral arteries to allow successful embryo implantation and development (9). In  
67 addition, this process involves many cells at the maternal-fetal interface, including  
68 some immune microenvironmental cells in addition to the trophoblast system  
69 described above (10), which fully reflects the heterogeneous nature of placental cells.

70 Numerous studies have confirmed that hypoxia is closely associated with the  
71 development of PE. decreased placental blood perfusion in the uterus of PE patients,

72 and the expression of hypoxia-related genes showed a striking correlation with the  
73 placenta of PE patients, with consistent results in both in vivo and in vitro models of  
74 placental hypoxia (11). The finding that rodent and primate models of uteroplacental  
75 ischemia and hypoxia (12, 13) and a rat model of uteroplacental ischemia or  
76 hypoperfusion (12) showed the same clinical signs as PE further confirms the  
77 relevance of hypoxia to PE. Previous studies have demonstrated that early gestational  
78 trophoblast cells produce large amounts of lactate through aerobic glycolysis at the  
79 maternal-fetal interface and that moderate levels of lactonization can regulate redox  
80 homeostasis and cell adhesion in the recipient endometrium to promote pregnancy.  
81 however, abnormally elevated lactate due to a persistent hypoxic environment may be  
82 detrimental to embryonic implantation (14, 15). As the oxygen receptor of cells,  
83 hypoxia-inducible factor-1 (HIF-1) plays a major regulatory role in the hypoxic  
84 environmental response, and HIF-1 activation in hypoxic environments can lead to  
85 reprogramming of energy and nutrient metabolism (16). In contrast, in patients with  
86 PE, HIF-1 activation causes CTB invasion dysfunction and incomplete helical artery  
87 remodeling in the placenta, leading to excessive lactate accumulation (17, 18). All of  
88 the above studies imply that lactate may play a crucial role in the microenvironment  
89 of PE patients. Although the work of Yollyseth Medina et al. confirmed that CTB  
90 hypoxia in PE patients activates anaerobic glycolysis leading to a functional defect in  
91 lactate transport proteins, which in turn leads to excessive lactate accumulation and  
92 promotes excessive protein lactation (19-21). However, the effect of hypoxia-induced  
93 protein hyperactivation on PE has never been explored.

94 Furthermore, mitochondria are the major source of intracellular ROS in hypoxic  
95 cells (22). Therefore, mitochondria play an important role in cell fate determination  
96 under hypoxia, which is accompanied by increased production of reactive oxygen  
97 species (ROS), causing oxidative stress (23), while excess ROS plays a role in cell  
98 death key role (24).

99 A number of studies have examined extensive changes in the human placental  
100 transcriptome (25, 26). Liu et al. performed single-cell RNA sequencing from human  
101 placenta and identified novel subtypes of trophoblasts, Hofbauer cells, and  
102 mesenchymal stromal cells (27, 28). Tsang et al. identified different cell subtypes in  
103 human placenta by analyzing more over 24,000 cells, identified different cell subtypes  
104 in the human placenta and reconstructed trophoblast differentiation trajectories (29).  
105 In addition to this, proteomic assays have rapidly matured, and analysis of proteomics  
106 can further yield complementary information combined with transcriptomic data to  
107 enhance biomarker discovery (30). However, the changes that occur in various cell  
108 types in placental tissues in the presence of hypoxia and the specific molecular  
109 mechanisms are not known. Therefore, in this study, we analyzed single-cell  
110 sequencing data to comprehensively characterize the molecular and cellular  
111 physiopathological abnormal ecology of PE in the hypoxic microenvironment, while  
112 combining single-cell transcriptome data with immunofluorescence, and proteomics  
113 data to enable the elucidation of PE cellular dynamics mechanisms under complex  
114 pathological conditions.

## 115 **Materials and Methods**

### 116 **Data sources**

117 The placenta is a highly heterogeneous organ that is closely associated with  
118 adverse pregnancies. Previous bulk sequencing of whole tissues could not reveal the  
119 characteristics of individual cells and cell-to-cell interactions. Here, we downloaded  
120 the GSE173193 dataset based on the GPL24676 platform from the Gene Expression  
121 Omnibus (GEO) database (<http://www.ncbi.nlm.nih.gov/geo/>), including single-cell  
122 sequencing data from placental samples of two PE patients and two normal controls.  
123 Sequencing data of placenta samples from the gestational diabetes mellitus group  
124 (GDM) and the advanced age group (GL) were excluded from this study.

125 In addition, this study collected a total of 15 PE patients and 15 placental tissues  
126 from a control donor. This study was approved by the Ethics Committee of The  
127 Affiliated Yantai Yuhuangding Hospital of Qingdao University and written consent  
128 was obtained from all patients or their legal guardians participating in the study.

### 129 **Cell lines and culture conditions**

130 HTR-8/SVneo (human immortalized EVT cell line) was purchased and cultured  
131 in DMEM/F12 medium (GIBCO, USA), 10% inactivated fetal bovine serum (GIBCO)  
132 and 1 % penicillin-streptomycin (GIBCO) at 37 °C and 5 % CO<sub>2</sub> until the logarithmic  
133 growth phase of cells. Cells were inoculated onto six-well culture plates at a rate of 1  
134 × 10<sup>5</sup> cells/well and incubated in an incubator at 37 °C and 5 % CO<sub>2</sub>. For various  
135 experiments under hypoxic conditions, cells were cultured at 37 °C in a humid  
136 chamber containing 2 % O<sub>2</sub> and 5 % CO<sub>2</sub> (Thermo, 3131, Waltham, Ma, USA).

### 137 **Tissue immunofluorescence**

138 PE patients and controls placenta (maternal side) tissue was embedded and  
139 sectioned (6 μm thickness), then routinely dewaxed in xylene alcohol, repaired with  
140 citric acid and then washed three times with distilled water for 3 min each. the  
141 sections were closed with 1% Bovine serum albumin (BSA) for 30 min at room  
142 temperature. the primary antibody was diluted with 1% BSA and incubated overnight  
143 at 4 degrees. the next day, the sections were washed three times with phosphate buffer  
144 solution (PBS) for 3 min each. then the sections were diluted with 1% BSA The  
145 fluorescent secondary antibody was incubated for 1 h in a 37°C incubator with closed  
146 light, and then the sections were washed three times with PBS for 3 min each time  
147 under closed conditions. then the sections were blocked by adding glycerol-diluted  
148 hoechst33342 (10 μg/ml) and photographed by laser confocal (Nikon, A1R+). For  
149 fluorescent direct-labeled primary antibodies, fluorescently labeled primary antibodies  
150 diluted with 1% BSA were added between washing away the secondary antibodies  
151 and adding nucleation reagents, and then the sections were washed three times with  
152 PBS for 3 min each time. in the case of non-fluorescently labeled secondary

153 antibodies with L-Lactyllysine, 488-labeled goat anti-rabbit secondary antibodies  
154 were added after incubating the primary antibodies for another 30 min.

#### 155 **IGF2BP2 mRNA in situ hybridization and immunofluorescence co-staining**

156 Cy3-tagged IGF2BP2 homo probe sequence:  
157 CTTGCCACCT+TTGCCAATCACCCG. RNA in situ hybridization was performed  
158 according to the kit instructions, and the main steps were: firstly, paraffin sections  
159 were routinely dewaxed, then proteinase K was briefly digested for 5 min in a 37°C  
160 incubator, closed and denatured, then the probe was diluted and mixed with biotin  
161 according to the kit instructions (i.e. Biotin-probe + SA-Cy3), and then added  
162 dropwise to the sections for hybridization, and after the hybridization reaction, the  
163 sections were washed with washing solution The sections were washed 15 min × 3  
164 times after the hybridization reaction, and finally the nuclei were stained with  
165 4',6-diamidino-2-phenylindole (DAPI). For co-staining with other proteins, after  
166 probe hybridization and before nucleation, the corresponding fluorescently labeled  
167 secondary antibody was added, and since the corresponding protein would be reduced  
168 after proteinase K digestion, the antibody concentration was increased and incubated  
169 for 30 min at 37°C in the incubator, followed by nucleation.

#### 170 **Flow cytometry**

171 The tissue was digested with trypsin into single cells, the medium was  
172 neutralized and digested and centrifuged to remove the trypsin, the cells were  
173 resuspended with PBS ( $1 \times 10^6$  cells/ml), then fluorophore-labeled flow antibody was  
174 added and a blank cell without antibody was set up simultaneously, incubated for 30  
175 min at room temperature in closed incubation on ice, and then the cells were sorted on  
176 a flow cytometer (BD, BD Aria II).

177 PE patients and control CTB, EVT, HTR-8 cells treated with hypoxia and their  
178 controls were loaded into 6-well plates at a density of  $1 \times 10^4$  cells/ml (three  
179 experiments were repeated) and incubated overnight at 37°C at 5% CO<sub>2</sub> as usual. Add  
180 5 μl of Annexin V (BD, Shanghai) and incubate for 15 min at room temperature,  
181 protected from light. Add PI (BD, Shanghai), take a slide to form a small chamber,  
182 take the above stained cell suspension from each centrifuge tube and add it to the  
183 small chamber, cover the slide and observe the apoptosis by flow cytometry.

#### 184 **Protein mass spectrometry analysis**

185 The proteins were removed from PE patients after immunoprecipitation from  
186 -80 °C and lysed by ultrasound. Protein concentration was determined using BCA kit  
187 (Beyotime, Shanghai, China). Equal amounts of each sample protein were taken for  
188 enzymatic digestion, and the volume was adjusted to the same level with the lysis  
189 solution, then DL-Dithiothreitol (DTT, Sigma-Aldrich, Germany) was added to a final  
190 concentration of 5 mM, and reduced at 56 °C for 30 min. Tetraethylammonium  
191 bromide (TEAB, Sigma-Aldrich, Germany) was added to dilute the urea to a

192 concentration below 2 M. Trypsin was added at a ratio of 1:50 (protease:protein, m/m)  
193 and digested overnight. The peptides were solubilized with liquid chromatography  
194 mobile phase A and separated using an EASY-nLC 1200 UHP system. Mobile phase  
195 A was an aqueous solution containing 0.1% formic acid and 2% acetonitrile; mobile  
196 phase B was an aqueous solution containing 0.1% formic acid and 90% acetonitrile.  
197 The liquid phase gradient settings were: 0-62 min, 4%-23% B; 62-82 min, 23%-35%  
198 B; 82-86 min, 35%-80% B; 86-90 min, 80% B, and the flow rate was maintained at  
199 500 nL/min. The peptides were separated by the UHPLC system and then injected  
200 into the NSI ion source for ionization and then into the Q Exactive™ HF-X mass  
201 spectrometer for analysis. HF-X mass spectrometry was used for analysis. The ion  
202 source voltage was set at 2.1 kV and the peptide parent ions and their secondary  
203 fragments were detected and analyzed using a high-resolution Orbitrap. The primary  
204 mass spectrometry scan range was set to 400 - 1500 m/z, and the scan resolution was  
205 set to 120,000; the secondary scan resolution was set to 15,000. The secondary mass  
206 spectrometry was performed. In order to improve the effective utilization of the mass  
207 spectrum, the automatic gain control (AGC) was set to 5E4, the signal threshold was  
208 set to 2.5E5 ions/s, the maximum injection time was set to 40 ms, and the dynamic  
209 exclusion time of the tandem mass spectrometry scan was set to 30 s seconds to avoid  
210 repeated scanning of the parent ions.

## 211 **Cell clustering and differentially expressed genes (DEGs)**

212 The Seurat package (31) was used for cell clustering of scRNA-seq data and to  
213 visualize clusters using the UMAP package (32). To define clusters, clusters  
214 characterized by similar marker genes were combined into one cell type, and  
215 subsequently marker genes for known cell types were used to define the partitioned  
216 cell clusters. In addition, the DEGs in each cell type of control donor and PE patient  
217 placental tissue were identified by the "FindAllMarkers" function of the Seurat  
218 package. Differences associated with adjusted P values, adjusted  $P < 0.05$ , were  
219 considered significant.

## 220 **Gene Regulatory Network (GRN)**

221 The Single Cell Regulatory Network Inference and Clustering (SCENIC)  
222 algorithm has been developed to evaluate regulatory network analysis associated with  
223 transcription factors (TFs) and to discover regulators (i.e., TFs and their target genes)  
224 in individual cells. To reconstruct gene regulatory networks from scRNAseq data in  
225 control donors and PE patients, we performed SCENIC analysis, which uses  
226 co-expression modules between TFs and candidate target genes, as well as a database  
227 of DNA binding patterns of TFs to infer important gene regulation of transcription  
228 factors (33, 34). Regulon modules based on regulon crosstalk (correlation between  
229 regulons and regulators) were determined by the connection specificity index (CSI),  
230 which ranks the importance of regulons and mitigates the effect of non-specific  
231 interactions, and visualized based on the R package ComplexHeatmap (35).

## 232 **Pseudo-Time Analysis**

233 In this study, single-cell trajectory analysis of cell subtypes was performed as  
234 needed. The R package Monocle 3 was applied to sort cells along the trajectory in  
235 pseudo-time (<https://cole-trapnell-lab.github.io/monocle3>) (36). After clustering the  
236 cells using the above method, the dimensionality was reduced and the results were  
237 visualized using the UMAP method. Subsequently, cells were sorted according to  
238 their progression through the developmental program. Monocle measured this  
239 progression in pseudo-time.

#### 240 **Functional enrichment analysis**

241 Gene ontology (GO) enrichment of cell clusters and Kyoto Encyclopedia of  
242 Genes and Genomes (KEGG) pathway analysis were used to determine the biological  
243 significance of each cell type. GO and KEGG pathway analysis was performed using  
244 the clusterProfiler package for marker genes for each cell subpopulation (37). In  
245 addition, Gene Set Enrichment Analysis (GSEA) was performed on DEGs (38) using  
246 `c2.cp.kegg.v7.0.symbols.gmt` from the MsigDB database (39) as a background set.  
247 GSEA was performed using the clusterProfiler package to perform and  $P < 0.05$  was  
248 considered significant.

#### 249 **Analysis of intercellular communication**

250 To further explore the interactions between different cell subpopulations, cellular  
251 communication analysis was performed using the R language iTALK package.  
252 iTALK identifies genes that are highly or differentially expressed in cell clusters and  
253 matches and pairs these genes through a receptor-ligand database to find important  
254 cellular intercellular communication events. Receptor-ligand interactions were  
255 determined using the STRING database of protein-protein interactions (40).

#### 256 **Molecular docking**

257 The three-dimensional structural (41) of the lactate molecule was downloaded  
258 from PubChem (<https://pubchem.ncbi.nlm.nih.gov/>), a public repository for biological  
259 activity data of small molecules and RNAi reagents. And the three-dimensional  
260 structure of PTBP1 protein was downloaded from the Protein Data Bank  
261 (<https://www.rcsb.org>) (42), and the binding sites and energy predictions of the lactate  
262 molecule and PTBP1 protein were evaluated by Autodock (43). In addition, Hex 8.0.0  
263 (44) was used to predict the binding sites and binding potential of PTBP1 protein to  
264 IGF2BP2 RNA molecules before and after lactylation. Pymol (45) was applied to  
265 visualize the docking model. Docking energy less than 0 indicates that the two have  
266 binding potential, and the lower the energy the higher the binding potential.

#### 267 **Data Analysis and Statistics**

268 In this study, all analyses were performed based on the Bioinformcloud platform  
269 (<http://www.bioinformcloud.org.cn>).

#### 270 **Results**

## 271 **Global single-cell landscape of the PE patients placenta**

272 The analytical flow of this study is shown in **Figure 1A**. Based on single-cell  
273 sequencing, we constructed a global single-cell landscape of PE patients placenta  
274 involving 46 cell clusters of 26,416 cells. These cell clusters were identified into 12  
275 cell types based on known markers, including Hofbauer, cytotrophoblasts (CTB),  
276 neutrophils, extravillous trophoblasts (EVT), blood cells (BC), maternal uterine  
277 dendritic cells (DC), syncytiotrophoblasts (STB), eosinophils, B cells, T cells,  
278 placental endothelial cells (En), and ecdysteroid cells (Dec) (**Figure 1B**). Each cell  
279 type showed specific expression of cell type markers (**Figure 1C**). Specifically,  
280 multiplex immunofluorescence experiments revealed that EVTs from PE patients  
281 placenta had less vascular endothelial growth factor receptor 1 (FLT1) relative to  
282 controls placenta (**Figure 1D**), whereas EVTs from the PE group had higher levels of  
283 lactic acidification modifications (**Figure 1E**). Overall, we constructed a global  
284 single-cell atlas of PE and control placenta with precise cell type annotation, depicted  
285 cellular ecological differences between PEs and controls placenta, and experimentally  
286 validated the levels of abnormal angiogenesis and lactic acidification modifications in  
287 EVTs.

## 288 **CTB cells in PE patients significantly inhibit cell cycle activation of apoptotic** 289 **signaling**

290 During human pregnancy, placenta-derived CTB can differentiate into EVT  
291 subpopulations involved in placental angiogenesis, which in turn play a key role in  
292 normal fetal growth and development. Therefore, dysfunction of these subpopulations  
293 may be an initiating risk factor mediating the development of PE. To this end, CTB  
294 cells were extracted for subpopulation identification to explore the possible  
295 mechanisms involved in these subpopulations in PE. A total of 14 subpopulations  
296 were obtained through the identification of CTB subpopulations (**Figure 2A**). Further  
297 comparison of cell abundance revealed that the proportion of cellular CTB\_CA8  
298 subpopulation was significantly increased and the proportion of CTB\_SGMS2  
299 subpopulation was significantly decreased in PE, and these two subpopulations were  
300 identified as specific CTB subpopulations (**Figure 2B**), and the expression of CA8  
301 and SGMS2 was subsequently mapped in the single cell profiles of CTB  
302 subpopulations (**Figure 2C**). To further explore the mechanism of CTB subpopulation  
303 involvement in PE, we extracted marker genes of CTB\_CA8 subpopulation and  
304 CTB\_SGMS2 subpopulation for enrichment analysis. The results showed that the  
305 HIF-1 signaling pathway, apoptosis and TNF signaling pathway were significantly  
306 enriched in the CTB\_CA8 subpopulation, while the cell cycle was significantly  
307 enriched in the CTB\_SGMS2 subpopulation (**Figure 2D**). The KEGG pathway map  
308 further revealed that the cell cycle activity of CTB\_CA8 cell subpopulation was  
309 reduced, while HIF-1 signaling pathway, apoptosis and necroptosis pathway were  
310 significantly activated (**Figure 2E**). Apoptosis and necroptosis were found to be more  
311 pronounced in PE by flow cytometry experiments (**Figure 2F**). Subsequent proposed  
312 chronological analysis revealed the developmental trajectory of CTB subpopulations,



313 and both specific CTB subpopulations were in an early developmental position  
314 (**Figure 2G**). GRN revealed that CTB subpopulation marker genes were divided into  
315 4 modules (**Figure 2H**), which were mainly regulated by TFs such as HEY2, HOXB6  
316 and ELF4 (**Figure 2I**). In conclusion, we identified significant cell cycle suppression  
317 and activation of apoptotic signaling by CTB cells in PE, and inferred the origin and  
318 trajectory of CTB cell pathogenesis and evolution, and constructed a GRN of CTB  
319 cells in the development and progression of PE.

## 320 **PE patients-specific EVT\_CSNK2B cell subpopulation and control** 321 **EVT\_FUCA1\_FLNB cell subpopulation**

322 Pregnancy is a complex and delicate process, and after blastocyst implantation in  
323 early gestation, placental EVT cells further invade, migrate and differentiate towards  
324 the metaplastic and myometrial vasculature of the uterus, initiating and completing  
325 vascular remodeling, which is a critical part of establishing maternal-fetal circulation.  
326 Therefore, we also extracted EVT cells for subpopulation identification and captured  
327 a total of 6 EVT subpopulations (**Figure 3A**). By comparing the cell abundance, it  
328 was found that the proportion of EVT\_CSNK2B subpopulation was significantly  
329 increased in PE compared with the control, while the proportion of  
330 EVT\_FUCA1\_FLNB subpopulation was significantly decreased (**Figure 3B**).  
331 Enrichment analysis revealed that markers of EVT\_CSNK2B subpopulation were  
332 significantly involved in pathways such as necroptosis, iron death, and HIF-1  
333 signaling pathway, while markers of EVT\_FUCA1\_FLNB subpopulation were  
334 significantly involved in pathways such as adhesive junctions, adherent spots, and  
335 tight junctions (**Figure 3C**). Subsequently, the expression of CSNK2B and FUCA1  
336 was mapped in the single-cell profiles of EVT subpopulations, while  
337 immunofluorescence showed low FLNB expression and high CSNK2B expression in  
338 EVT cells with PE (**Figure 3D**), which was consistent with the results of the raw  
339 signal analysis (**Figure 3B**). The GRN of EVT cell subpopulations suggested that the  
340 markers of EVT cells were divided into 5 modules in total (**Figure 3F**) and regulated  
341 by MAFG, SRF, KLF7, and ETV4 TFs (**Figure 3G**). In conclusion, we identified  
342 subpopulations of EVT cells in PE and the pathways they participate in, inferred the  
343 origin and trajectory of the evolution of EVT cell pathology, and constructed a GRN  
344 of EVT cells in the development and progression of PE.

## 345 **Inhibition of IGF2BP2 expression causes defective mitochondrial autophagy and** 346 **adherent patch signaling in EVT of PE patients**

347 As a specific subpopulation of EVT, the EVT\_CSNK2B subpopulation may play  
348 an important role in the development of PE. Therefore, to further explore the potential  
349 mechanisms involved in the development of PE, we performed GSEA on the  
350 EVT\_CSNK2B subpopulation. The results showed that mitochondrial autophagy,  
351 adherent spots and associated metabolic signals were inhibited in the EVT\_CSNK2B  
352 subpopulation (**Figure 4A**). We then constructed a comprehensive regulatory network  
353 of upstream regulators (IGF2BP2, PLXNB2, TCF7L2, MBNL2, MYC, RBFOX2,

354 MLLT1, NEAT1) on mitochondrial autophagy, adherent spots and associated  
355 metabolic signaling in the EVT\_CSNK2B cell subpopulation (**Figure 4B**).  
356 Intriguingly, IGF2BP2 is an N6-methyladenosine (m<sup>6</sup>A)-associated gene that  
357 enhances mRNA stability and promotes translation as an m<sup>6</sup>A reader protein.  
358 Therefore, we mapped its expression in single-cell profiles of EVT subpopulations  
359 and found that IGF2BP2 was widely expressed in the dominant subpopulation of  
360 control pregnant women, EVT\_FUCA1\_FLNB, yet significantly reduced in the  
361 PE-specific EVT\_CSNK2B cell subpopulation (**Figure 4C**). Furthermore, multiplex  
362 immunofluorescence experiments confirmed that IGF2BP2 was lowly expressed in  
363 EVT cells from placenta in the PE patients compared to controls (**Figure 4D, E**).  
364 Briefly, inhibition of IGF2BP2 expression in PE causes defective mitochondrial  
365 autophagy and adherent spot signaling in EVT.

### 366 **Hypoxia promotes PTBP1 lactonization leading to PTBP1 inactivation inhibiting** 367 **RNA processing and synthesis of IGF2BP2 mediating the disease process of PE**

368 However, it is puzzling what causes the suppression of RNA expression of  
369 IGF2BP2 in PE. To this end, we identified the core molecule regulating IGF2BP2  
370 expression PTBP1. Notably, there was no significant difference in the protein  
371 abundance of PTBP1 in EVT cells from PE patients in multiplex immunofluorescence  
372 assays (**Figure 5A**), and there was no binding of PTBP1 protein and IGF2BP2 probe  
373 in EVT cells from PE patients with hyperlactation, but there was binding in controls,  
374 suggesting that PTBP1 protein in placental EVT from PE patients had a weaker  
375 ability to bind RNA molecules of IGF2BP2 (**Figure 5B**). Furthermore, the binding  
376 potential of PTBP1 and lactic acid small molecules was identified by molecular  
377 docking (**Figure 5C**), indicating that PTBP1 protein is capable of lactonization and  
378 that the structure of lactonized PTBP1 protein is disrupted. In addition, the  
379 post-lactated PTBP1 protein had a much lower RNA binding potential to IGF2BP2  
380 (**Figure 5D**).

381 The effect of suppression of RNA expression of IGF2BP2 on PE has not been  
382 clarified. Therefore, we explored in depth the mechanisms involved in IGF2BP2  
383 inhibition. First, we found that the mitochondrial autophagic pathway in  
384 EVT\_CSNK2B cell subpopulation was significantly activated (**Figure 5E**). Flow  
385 cytometry showed that mitochondrial autophagy was inhibited after placental EVT  
386 cells were treated with hypoxia (**Figure 5F**), and not only that, the cells showed early  
387 apoptosis and necrotizing apoptosis in EVT cells of PE and hypoxic HTR-8 cell line  
388 (**Figure 5G**).

389 Since significant activation of adherent spot signals is a major manifestation of  
390 cell migration and invasion, we also explored the activation of invasion-related  
391 signals such as adherent spots in EVT subpopulations after IGF2BP2 inhibition. We  
392 found that adherent patch signaling was significantly suppressed in the  
393 EVT\_CSNK2B cell subpopulation (**Figure 5H**), and in addition, multiple  
394 immunofluorescence experiments confirmed that the expression of the key molecule

395 of adherent patch signaling (CAPN2) was suppressed in EVT cells from PE patients  
396 **(Figure 5I)**.

397 In summary, our results show that lactylation of PTBP1 in EVT cells under  
398 hypoxic microenvironment leads to its inactivation, inhibits RNA processing  
399 synthesis of IGF2BP2, promotes damage depletion of mitochondria and inhibits  
400 mitochondrial autophagy, causing accumulation of damaged mitochondria, inducing  
401 apoptosis and necrotic apoptosis of EVT cells while blocking lactate metabolism and  
402 intensifying lactate accumulation, forming a feedback It also inhibits the EVT  
403 adhesion spot signaling pathway and weakens the invasive ability of EVT, leading to  
404 insufficient reconstruction of placental spiral vasodilation and forming a feedback  
405 vicious external loop. The continued activation of the malignant internal and external  
406 dual circulation system in the hypoxic microenvironment drives the disease process of  
407 PE **(Figure 5J)**.

#### 408 **Microenvironmental immune cell ecology of the placenta in PE**

409 During different periods of pregnancy, the immune microenvironment at the  
410 maternal-fetal interface exhibits a dynamic balance, which facilitates the  
411 establishment and maintenance of pregnancy as well as fetal growth and development.  
412 To this end, we extracted immune cells from PE patients placenta for subpopulation  
413 identification to explore the microenvironmental immune cell ecology of PE patients  
414 placenta. A total of 11 subpopulations were captured by subpopulation identification  
415 of the indicated Hofbauer cells **(Figure 6A)**, and the distinctive markers of these  
416 subpopulations are shown **(Figure 6C)**. Among them, the Hofbauer\_ALPL\_NBN  
417 subpopulation was significantly reduced in proportion in PE, while the  
418 Hofbauer\_BTG3 subpopulation was significantly increased **(Figure 6B)**. For  
419 Neutrophils, a total of 5 subgroups were captured, of which the Neutrophils\_S100A12  
420 subgroup had a significantly higher proportion in PE, while the markers of these  
421 subgroups are shown **(Figure 6D-F)**. For DCs, a total of 5 subpopulations were  
422 captured **(Figure 6G)**, and the proportion of  
423 DC\_NEU1\_IGF1\_CBLB\_PDE2A\_BCL2L1 subpopulation was significantly elevated  
424 in PE **(Figure 6H-I)**. For T cells, a total of 7 subpopulations were captured **(Figure**  
425 **6J)**, with the proportion of T\_CHPT1 subpopulation and T\_LRRN3 subpopulation  
426 significantly elevated in PE **(Figure 6K-L)**. Overall, by exploring the differences in  
427 the composition of these immune cell subpopulations in controls and PE patients  
428 placenta, we preliminarily characterized the immune cell ecology of the  
429 microenvironment in PE.

#### 430 **Abnormal metabolic signaling of PE patients-specific EVT subpopulations** 431 **interacts with microenvironmental immune cells to activate metabolic** 432 **inflammation**

433 Previous studies have shown that each week of pregnancy involves a plethora of  
434 physiological changes and metabolic adaptations, and that even small deviations from  
435 normal norms may have adverse consequences at different stages of pregnancy.

436 Therefore, we explored the interaction of abnormal metabolic signaling in EVT  
437 subpopulations with microenvironmental immune cells. Based on KEGG pathway  
438 maps, we found that the EVT\_CS NK2B cell subpopulation significantly promoted  
439 glutathione (anti-inflammatory metabolite) metabolism, inhibited sphingolipid  
440 (pro-inflammatory metabolite) metabolism, and suppressed the biosynthesis of  
441 various glycans (anti-inflammatory metabolites) (**Figure 7A**). The prevalence of  
442 interactions between the EVT\_CS NK2B subpopulation of PE and immune cell  
443 subpopulations was revealed by cell communication analysis (**Figure 7B**), and the  
444 genes for these interactions were further demonstrated (**Figure 7C**). GSEA showed  
445 that immune cell clusters of PE, including Hofbauer cells, Neutrophils cells, DCs, and  
446 T cells, generally significantly activated immune inflammation-related pathways  
447 (**Figure 7D-G**). Taken together, these results suggest an interaction between abnormal  
448 metabolic signaling of PE patients-specific EVT subpopulations and  
449 microenvironmental immune cells, which activates metabolic inflammation.

## 450 **Discussion**

451 This study provides a comprehensive and in-depth dissection of cellular  
452 dynamics in the placenta of PE patients from single-cell sequencing data, thus  
453 enabling the elucidation of the abnormal molecular and cytopathological ecology of  
454 protein hyperlactation-mediated PE in the hypoxic microenvironment under complex  
455 pathological conditions.

456 In the global single-cell ecosystem of PE, we found an increased proportion of  
457 carbonic anhydrase 8 (CA8)-positive CTBs (CTB\_CA8) in almost all patients,  
458 accompanied by reduced cell cycle activity and significant activation of the HIF-1  
459 pathway and apoptotic cell death pathways. CTB cells in the placenta of PE patients  
460 undergo excessive cell death, including apoptosis, and if left unchecked, these  
461 processes lead to apoptosis sweeping throughout the syncytium eventually stimulating  
462 extensive death at this fundamental interface of maternal-fetal exchange (46, 47).  
463 Thus, maintaining homeostasis of the trophoblastic hypoxic microenvironment is  
464 essential to slow or inhibit PE progression. In addition, studies have captured an  
465 abnormally increased subpopulation of CS NK2B-positive EVT in the placenta of PE  
466 patients. Based on comprehensive regulatory network analysis of this subpopulation,  
467 m<sup>6</sup>A reading protein insulin-like growth factor 2 mRNA binding protein 2 (IGF2BP2)  
468 was identified as a key regulator involved in mitochondrial autophagy and adherent  
469 plaque signaling pathways. IGF2BP2 is one member of the IGF2BP family that has  
470 previously been regarded as oncofetal, as its members were originally discovered in  
471 developing embryos (48). IGF2BP2 is an important gene associated with type 2  
472 diabetes (49). Another IGF2BP family member, IGF2BP3, was found to stimulate  
473 trophoblast cell invasion and migration. In addition, in recent studies, IGF2BP2 was  
474 confirmed which trophoblast cells invade and migrate. However, no study has yet  
475 investigated the invasion and migration of IGF2BP2 at the single cell level in PE (50,  
476 51). It is well known that post-transcriptional modifications of messenger RNAs  
477 (mRNAs), among which m<sup>6</sup>A is the most abundant internal RNA modification,

478 regulate genes expression by influencing mRNA splicing, stability, translocation and  
479 translation (52). Moreover, m<sup>6</sup>A modification exerts its biological functions by  
480 “readers”: YTH (YT521-B homology) domain proteins including YTHDC1-2 and the  
481 YTH-family proteins YTHDF1–3 as well as insulin-like growth factor 2 mRNA  
482 binding proteins IGF2BP1-3 (53). Among these m<sup>6</sup>A readers, IGF2BP2 binds RNA  
483 via its six characteristic RNA-binding domains, containing two RNA recognition  
484 motifs (RRM1 and RRM2) and four K Homology (KH) domains (KH1-KH4) (54).

485 In addition, we identified a core regulator, polypyrimidine bundle-binding  
486 protein 1 (PTBP1), in a study of lactonization in a CSNK2B-positive EVT  
487 subpopulation. Previous studies have demonstrated that PTBP1 is a known regulator  
488 of post-transcriptional gene expression with representative roles in controlling mRNA  
489 splicing, translation, stability and localization, and more strikingly, recent studies  
490 have identified its involvement in glycolytic processes. PTBP1 is a key determinant of  
491 pyruvate kinase isoform 2 in PKM embryos and is used to promote aerobic glycolysis  
492 (55-58). PTBP1 is closely related to the initial formation of the embryo, and PTBP1  
493 serves as a factor essential for early embryonic development, especially because it is  
494 necessary for rapid cell division and is essential for embryonic stem cell proliferation  
495 (59). However, its potential role and specific molecular mechanisms have not been  
496 reported in PE. Our study concluded that the mechanism of IGF2BP2 low expression  
497 contributes to the poor internal and external circulation of PE. First, PTBP1  
498 lactonization mediates its inactivation and drives IGF2BP2 low expression, which in  
499 turn inhibits mitochondrial autophagy and leads to the continuous accumulation of  
500 damaged mitochondria, blocking cellular lactate metabolism for energy while  
501 promoting EVT apoptosis and further accumulation of lactate, resulting in a feedback  
502 poor internal circulation. Second, PTBP1 lactation-mediated IGF2BP2 low expression  
503 also significantly inhibits the adherent plaque signaling pathway, which significantly  
504 reduces the invasive capacity of EVT and becomes a persistent obstacle to spiral  
505 artery reconstruction, further exacerbating the placental ischemic and hypoxic  
506 microenvironment and creating a feedback adverse external circulation. A recent  
507 study by Vangrieken P found signs of increased oxidative stress and mitochondrial  
508 dysfunction in the placenta of PE, suggesting that mitochondria could be a potential  
509 novel therapeutic target in PE (60). In previous studies, mitochondrial autophagy was  
510 considered as a cellular defense that removes excess mitochondrial fragments in PE  
511 (61). However, in the present study, mitochondrial autophagy was found to be  
512 inhibited in EVT cells of PE patients. The HIF-1 signaling pathway was significantly  
513 activated, suggesting that hypoxia induces oxidative stress in PE. Furthermore,  
514 migration/invasion of EVT cells is tightly regulated by some adhesion molecules,  
515 mainly in an autocrine or paracrine manner at the fetal-maternal interface in human  
516 pregnancy (62). In the present study, the expression of genes related to adhesive patch  
517 signaling was found to be significantly downregulated in PE, suggesting that m<sup>6</sup>A  
518 methylated IGF2BP2 reading defects inhibit adhesive patch signaling and reduce the  
519 invasive capacity of EVT cells.

520 Analysis of PE patients placental microenvironmental immune cells in  
521 combination with EVT showed that the microenvironmental immune cell function in  
522 PE is mainly focused on immune response, suggesting that placental immune function  
523 is altered in PE patients. On the one hand, EVT requires remodeling of the uterine  
524 spiral arteries, as well as invasion of the metaplastic tissue of the uterus and anchoring  
525 of the placenta to the uterine wall. During these processes, different types of  
526 microenvironmental immune cells are encountered (63). In order to adapt to each  
527 other, a rational immune regulation is necessary.

528 In summary, our study establishes a large-scale single-cell transcriptome  
529 ecological landscape of normal and PE patients placenta and demonstrates changes in  
530 cellular dynamics in PE patients placenta, elucidating the abnormal ecological balance  
531 of molecular and cellular physiopathology mediated by protein hyperlactation in PE  
532 in the hypoxic microenvironment. This opens an avenue to resolve cellular dynamics  
533 and aberrations in the complex biological system of PE and to establish a molecular  
534 diagnosis of PE. However, the current study still has some limitations. Firstly, our  
535 results should be validated in a large-scale study due to the insufficient sample size.  
536 Second, the interactions between these abnormal cells in PE deserve further  
537 investigation.

#### 538 **Data Availability Statement**

539 The datasets analyzed during the current study are available in the GEO database  
540 (<https://www.ncbi.nlm.nih.gov/geo/>).

#### 541 **Conflict of interests**

542 The authors report no conflicts of interest related to this work.

#### 543 **Funding**

544 This research was supported by the Natural Science Foundation of Shandong  
545 Province (ZR2021MH223).

#### 546 **Acknowledgments**

547 Not applicable.

#### 548 **Author Contributions**

549 Hongmei Qu, Xiaoyan Li and Qian Li analyzed the data and drafted the manuscript.  
550 Linsong Mu, Yanfen Zou and Yongli Chu designed the study and revised the  
551 manuscript. Yan Feng ,Xiaoming Yang, Li Yu and Liping Qu produced and edited the  
552 chart. All authors contributed to data analysis, drafting or revising the article, have  
553 agreed on the journal to which the article will be submitted, gave final approval of the  
554 version to be published, and agree to be accountable for all aspects of the work.

555 **References**

- 556 1. Hypertension in pregnancy. Report of the American College of Obstetricians and  
557 Gynecologists' Task Force on Hypertension in Pregnancy. *Obstet Gynecol.*  
558 2013;122(5):1122-31.
- 559 2. Rasmussen M, Reddy M, Nolan R, Camunas-Soler J, Khodursky A, Scheller NM,  
560 et al. RNA profiles reveal signatures of future health and disease in pregnancy. *Nature.*  
561 2022;601(7893):422-7.
- 562 3. Steegers EA, von Dadelszen P, Duvekot JJ, Pijnenborg R. Pre-eclampsia. *Lancet.*  
563 2010;376(9741):631-44.
- 564 4. Murali AR, Devarbhavi H, Venkatachala PR, Singh R, Sheth KA. Factors that  
565 predict 1-month mortality in patients with pregnancy-specific liver disease. *Clin*  
566 *Gastroenterol Hepatol.* 2014;12(1):109-13.
- 567 5. Phipps EA, Thadhani R, Benzing T, Karumanchi SA. Pre-eclampsia:  
568 pathogenesis, novel diagnostics and therapies. *Nat Rev Nephrol.* 2019;15(5):275-89.
- 569 6. Abalos E, Cuesta C, Grosso AL, Chou D, Say L. Global and regional estimates of  
570 preeclampsia and eclampsia: a systematic review. *Eur J Obstet Gynecol Reprod Biol.*  
571 2013;170(1):1-7.
- 572 7. Guo F, Zhang B, Yang H, Fu Y, Wang Y, Huang J, et al. Systemic transcriptome  
573 comparison between early- And late-onset pre-eclampsia shows distinct pathology  
574 and novel biomarkers. *Cell Prolif.* 2021;54(2):e12968.
- 575 8. Liu X, Chen H, Kong W, Zhang Y, Cao L, Gao L, et al. Down-regulated long  
576 non-coding RNA-ATB in preeclampsia and its effect on suppressing migration,  
577 proliferation, and tube formation of trophoblast cells. *Placenta.* 2017;49:80-7.
- 578 9. Vento-Tormo R, Efremova M, Botting RA, Turco MY, Vento-Tormo M, Meyer  
579 KB, et al. Single-cell reconstruction of the early maternal-fetal interface in humans.  
580 *Nature.* 2018;563(7731):347-53.
- 581 10. Turco MY, Moffett A. Development of the human placenta. *Development.*  
582 2019;146(22).
- 583 11. Soleymanlou N, Jurisica I, Nevo O, Ietta F, Zhang X, Zamudio S, et al. Molecular  
584 evidence of placental hypoxia in preeclampsia. *J Clin Endocrinol Metab.*  
585 2005;90(7):4299-308.
- 586 12. Makris A, Thornton C, Thompson J, Thomson S, Martin R, Ogle R, et al.  
587 Uteroplacental ischemia results in proteinuric hypertension and elevated sFLT-1.  
588 *Kidney Int.* 2007;71(10):977-84.
- 589 13. Gilbert JS, Nijland MJ, Knoblich P. Placental ischemia and cardiovascular  
590 dysfunction in preeclampsia and beyond: making the connections. *Expert Rev*  
591 *Cardiovasc Ther.* 2008;6(10):1367-77.
- 592 14. Yang Q, Liu J, Wang Y, Zhao W, Wang W, Cui J, et al. A proteomic atlas of  
593 ligand-receptor interactions at the ovine maternal-fetal interface reveals the role of  
594 histone lactylation in uterine remodeling. *J Biol Chem.* 2022;298(1):101456.
- 595 15. Ma LN, Huang XB, Muyayalo KP, Mor G, Liao AH. Lactic Acid: A Novel  
596 Signaling Molecule in Early Pregnancy? *Front Immunol.* 2020;11:279.

- 597 16. Jaakkola P, Mole DR, Tian YM, Wilson MI, Gielbert J, Gaskell SJ, et al.  
598 Targeting of HIF- $\alpha$  to the von Hippel-Lindau ubiquitylation complex by  
599 O<sub>2</sub>-regulated prolyl hydroxylation. *Science*. 2001;292(5516):468-72.
- 600 17. Yu N, Wu JL, Xiao J, Fan L, Chen SH, Li W. HIF-1 $\alpha$  regulates angiogenesis  
601 via Notch1/STAT3/ETBR pathway in trophoblastic cells. *Cell Cycle*.  
602 2019;18(24):3502-12.
- 603 18. Macklin PS, McAuliffe J, Pugh CW, Yamamoto A. Hypoxia and HIF pathway in  
604 cancer and the placenta. *Placenta*. 2017;56:8-13.
- 605 19. Kay HH, Zhu S, Tsoi S. Hypoxia and lactate production in trophoblast cells.  
606 *Placenta*. 2007;28(8-9):854-60.
- 607 20. Peguero A, Parra RA, Carrillo SP, Rojas-Suarez J, Figueras F. Association of  
608 plasma lactate concentration at admission of severe preeclampsia to maternal  
609 complications. *Pregnancy Hypertens*. 2019;17:89-93.
- 610 21. Medina Y, Acosta L, Reppetti J, Corominas A, Bustamante J, Szpilbarg N, et al.  
611 Lactic Acid Transport Mediated by Aquaporin-9: Implications on the  
612 Pathophysiology of Preeclampsia. *Front Physiol*. 2021;12:774095.
- 613 22. Brand MD, Affourtit C, Esteves TC, Green K, Lambert AJ, Miwa S, et al.  
614 Mitochondrial superoxide: production, biological effects, and activation of uncoupling  
615 proteins. *Free Radic Biol Med*. 2004;37(6):755-67.
- 616 23. Smith KA, Waypa GB, Schumacker PT. Redox signaling during hypoxia in  
617 mammalian cells. *Redox Biol*. 2017;13:228-34.
- 618 24. Fuhrmann DC, Brune B. Mitochondrial composition and function under the  
619 control of hypoxia. *Redox Biol*. 2017;12:208-15.
- 620 25. Sober S, Reiman M, Kikas T, Rull K, Inno R, Vaas P, et al. Extensive shift in  
621 placental transcriptome profile in preeclampsia and placental origin of adverse  
622 pregnancy outcomes. *Sci Rep*. 2015;5:13336.
- 623 26. Kleinrouweler CE, van Uitert M, Moerland PD, Ris-Stalpers C, van der Post JA,  
624 Afink GB. Differentially expressed genes in the pre-eclamptic placenta: a systematic  
625 review and meta-analysis. *PLoS One*. 2013;8(7):e68991.
- 626 27. Liu Y, Fan X, Wang R, Lu X, Dang YL, Wang H, et al. Single-cell RNA-seq  
627 reveals the diversity of trophoblast subtypes and patterns of differentiation in the  
628 human placenta. *Cell Res*. 2018;28(8):819-32.
- 629 28. Pavlicev M, Wagner GP, Chavan AR, Owens K, Maziarz J, Dunn-Fletcher C, et  
630 al. Single-cell transcriptomics of the human placenta: inferring the cell  
631 communication network of the maternal-fetal interface. *Genome Res*.  
632 2017;27(3):349-61.
- 633 29. Tsang JCH, Vong JSL, Ji L, Poon LCY, Jiang P, Lui KO, et al. Integrative  
634 single-cell and cell-free plasma RNA transcriptomics elucidates placental cellular  
635 dynamics. *Proc Natl Acad Sci U S A*. 2017;114(37):E7786-E95.
- 636 30. Akbani R, Ng PK, Werner HM, Shahmoradgoli M, Zhang F, Ju Z, et al. A  
637 pan-cancer proteomic perspective on The Cancer Genome Atlas. *Nat Commun*.  
638 2014;5:3887.
- 639 31. Stuart T, Butler A, Hoffman P, Hafemeister C, Papalexi E, Mauck WM, 3rd, et al.  
640 Comprehensive Integration of Single-Cell Data. *Cell*. 2019;177(7):1888-902 e21.



- 641 32. Becht E, McInnes L, Healy J, Dutertre CA, Kwok IWH, Ng LG, et al.  
642 Dimensionality reduction for visualizing single-cell data using UMAP. *Nat*  
643 *Biotechnol.* 2018.
- 644 33. Aibar S, Gonzalez-Blas CB, Moerman T, Huynh-Thu VA, Imrichova H,  
645 Hulselmans G, et al. SCENIC: single-cell regulatory network inference and clustering.  
646 *Nat Methods.* 2017;14(11):1083-6.
- 647 34. Van de Sande B, Flerin C, Davie K, De Waegeneer M, Hulselmans G, Aibar S, et  
648 al. A scalable SCENIC workflow for single-cell gene regulatory network analysis.  
649 *Nat Protoc.* 2020;15(7):2247-76.
- 650 35. Gu Z, Eils R, Schlesner M. Complex heatmaps reveal patterns and correlations in  
651 multidimensional genomic data. *Bioinformatics.* 2016;32(18):2847-9.
- 652 36. Trapnell C, Cacchiarelli D, Grimsby J, Pokharel P, Li S, Morse M, et al. The  
653 dynamics and regulators of cell fate decisions are revealed by pseudotemporal  
654 ordering of single cells. *Nat Biotechnol.* 2014;32(4):381-6.
- 655 37. Yu G, Wang LG, Han Y, He QY. clusterProfiler: an R package for comparing  
656 biological themes among gene clusters. *OMICS.* 2012;16(5):284-7.
- 657 38. Subramanian A, Tamayo P, Mootha VK, Mukherjee S, Ebert BL, Gillette MA, et  
658 al. Gene set enrichment analysis: a knowledge-based approach for interpreting  
659 genome-wide expression profiles. *Proc Natl Acad Sci U S A.* 2005;102(43):15545-50.
- 660 39. Liberzon A, Birger C, Thorvaldsdottir H, Ghandi M, Mesirov JP, Tamayo P. The  
661 Molecular Signatures Database (MSigDB) hallmark gene set collection. *Cell Syst.*  
662 2015;1(6):417-25.
- 663 40. Szklarczyk D, Morris JH, Cook H, Kuhn M, Wyder S, Simonovic M, et al. The  
664 STRING database in 2017: quality-controlled protein-protein association networks,  
665 made broadly accessible. *Nucleic Acids Res.* 2017;45(D1):D362-D8.
- 666 41. Kim S, Chen J, Cheng T, Gindulyte A, He J, He S, et al. PubChem in 2021: new  
667 data content and improved web interfaces. *Nucleic Acids Res.*  
668 2021;49(D1):D1388-D95.
- 669 42. Burley SK, Berman HM, Kleywegt GJ, Markley JL, Nakamura H, Velankar S.  
670 Protein Data Bank (PDB): The Single Global Macromolecular Structure Archive.  
671 *Methods Mol Biol.* 2017;1607:627-41.
- 672 43. Trott O, Olson AJ. AutoDock Vina: improving the speed and accuracy of docking  
673 with a new scoring function, efficient optimization, and multithreading. *J Comput*  
674 *Chem.* 2010;31(2):455-61.
- 675 44. Macindoe G, Mavridis L, Venkatraman V, Devignes MD, Ritchie DW.  
676 HexServer: an FFT-based protein docking server powered by graphics processors.  
677 *Nucleic Acids Res.* 2010;38(Web Server issue):W445-9.
- 678 45. Mooers BHM. Shortcuts for faster image creation in PyMOL. *Protein Sci.*  
679 2020;29(1):268-76.
- 680 46. Longtine MS, Chen B, Odibo AO, Zhong Y, Nelson DM. Villous trophoblast  
681 apoptosis is elevated and restricted to cytotrophoblasts in pregnancies complicated by  
682 preeclampsia, IUGR, or preeclampsia with IUGR. *Placenta.* 2012;33(5):352-9.

- 683 47. Bailey LJ, Alahari S, Tagliaferro A, Post M, Caniggia I. Augmented trophoblast  
684 cell death in preeclampsia can proceed via ceramide-mediated necroptosis. *Cell Death*  
685 *Dis.* 2017;8(2):e2590.
- 686 48. Christiansen J, Kolte AM, Hansen T, Nielsen FC. IGF2 mRNA-binding protein 2:  
687 biological function and putative role in type 2 diabetes. *J Mol Endocrinol.*  
688 2009;43(5):187-95.
- 689 49. Dai N, Zhao L, Wrighting D, Kramer D, Majithia A, Wang Y, et al.  
690 IGF2BP2/IMP2-Deficient mice resist obesity through enhanced translation of Ucp1  
691 mRNA and Other mRNAs encoding mitochondrial proteins. *Cell Metab.*  
692 2015;21(4):609-21.
- 693 50. Li W, Liu D, Chang W, Lu X, Wang YL, Wang H, et al. Role of IGF2BP3 in  
694 trophoblast cell invasion and migration. *Cell Death Dis.* 2014;5:e1025.
- 695 51. Wu L, Song WY, Xie Y, Hu LL, Hou XM, Wang R, et al. miR-181a-5p  
696 suppresses invasion and migration of HTR-8/SVneo cells by directly targeting  
697 IGF2BP2. *Cell Death Dis.* 2018;9(2):16.
- 698 52. Zhao BS, Roundtree IA, He C. Post-transcriptional gene regulation by mRNA  
699 modifications. *Nat Rev Mol Cell Biol.* 2017;18(1):31-42.
- 700 53. Wang X, He C. Reading RNA methylation codes through methyl-specific binding  
701 proteins. *RNA Biol.* 2014;11(6):669-72.
- 702 54. Dai N, Rapley J, Angel M, Yanik MF, Blower MD, Avruch J. mTOR  
703 phosphorylates IMP2 to promote IGF2 mRNA translation by internal ribosomal entry.  
704 *Genes Dev.* 2011;25(11):1159-72.
- 705 55. Takahashi H, Nishimura J, Kagawa Y, Kano Y, Takahashi Y, Wu X, et al.  
706 Significance of Polypyrimidine Tract-Binding Protein 1 Expression in Colorectal  
707 Cancer. *Mol Cancer Ther.* 2015;14(7):1705-16.
- 708 56. Shinohara H, Kumazaki M, Minami Y, Ito Y, Sugito N, Kuranaga Y, et al.  
709 Perturbation of energy metabolism by fatty-acid derivative AIC-47 and imatinib in  
710 BCR-ABL-harboring leukemic cells. *Cancer Lett.* 2016;371(1):1-11.
- 711 57. Christofk HR, Vander Heiden MG, Harris MH, Ramanathan A, Gerszten RE,  
712 Wei R, et al. The M2 splice isoform of pyruvate kinase is important for cancer  
713 metabolism and tumour growth. *Nature.* 2008;452(7184):230-3.
- 714 58. David CJ, Chen M, Assanah M, Canoll P, Manley JL. HnRNP proteins controlled  
715 by c-Myc deregulate pyruvate kinase mRNA splicing in cancer. *Nature.*  
716 2010;463(7279):364-8.
- 717 59. Suckale J, Wendling O, Masjkur J, Jager M, Munster C, Anastassiadis K, et al.  
718 PTBP1 is required for embryonic development before gastrulation. *PLoS One.*  
719 2011;6(2):e16992.
- 720 60. Vangrieken P, Al-Nasiry S, Bast A, Leermakers PA, Tulen CBM, Schiffers PMH,  
721 et al. Placental Mitochondrial Abnormalities in Preeclampsia. *Reprod Sci.*  
722 2021;28(8):2186-99.
- 723 61. Ausman J, Abbade J, Ermini L, Farrell A, Tagliaferro A, Post M, et al.  
724 Ceramide-induced BOK promotes mitochondrial fission in preeclampsia. *Cell Death*  
725 *Dis.* 2018;9(3):298.

- 726 62. Chakraborty C, Gleeson LM, McKinnon T, Lala PK. Regulation of human  
727 trophoblast migration and invasiveness. *Can J Physiol Pharmacol.* 2002;80(2):116-24.  
728 63. Pollheimer J, Vondra S, Baltayeva J, Beristain AG, Knofler M. Regulation of  
729 Placental Extravillous Trophoblasts by the Maternal Uterine Environment. *Front*  
730 *Immunol.* 2018;9:2597.  
731  
732

733 **Figure legend**

734 **Figure 1. Global single-cell landscape of PE patients placenta.** A. Study flow of  
 735 this work. A global single-cell landscape of PE patients placenta was constructed  
 736 based on single-cell technology, capturing a total of 26,416 cells from 46 cell clusters.  
 737 B. Single-cell atlas mapping cell types, including fetal macrophages (Hofbauer),  
 738 cytotrophoblasts (CTB), Neutrophils, extravillous trophoblasts (EVT), blood cells  
 739 (BC), maternal uterine dendritic cells (DC), syncytiotrophoblasts (STB), Eosinophils,  
 740 B cells, T cells, placental endothelial cells (En), and ecdysteroid cells (Dec). C.  
 741 Bubble plots showing cellular markers guiding cell annotation. D. Multiplex  
 742 immunofluorescence plots showing PEs and controls extravillous trophoblast (EVT)  
 743 and endothelial landscapes. Highlights are erythrocytes, compared to more  
 744 vascular/hematocrit in the controls and less in the PEs. E. Multiplex  
 745 immunofluorescence map demonstrating the level of lactonization modification of  
 746 EVT in the PEs and controls.

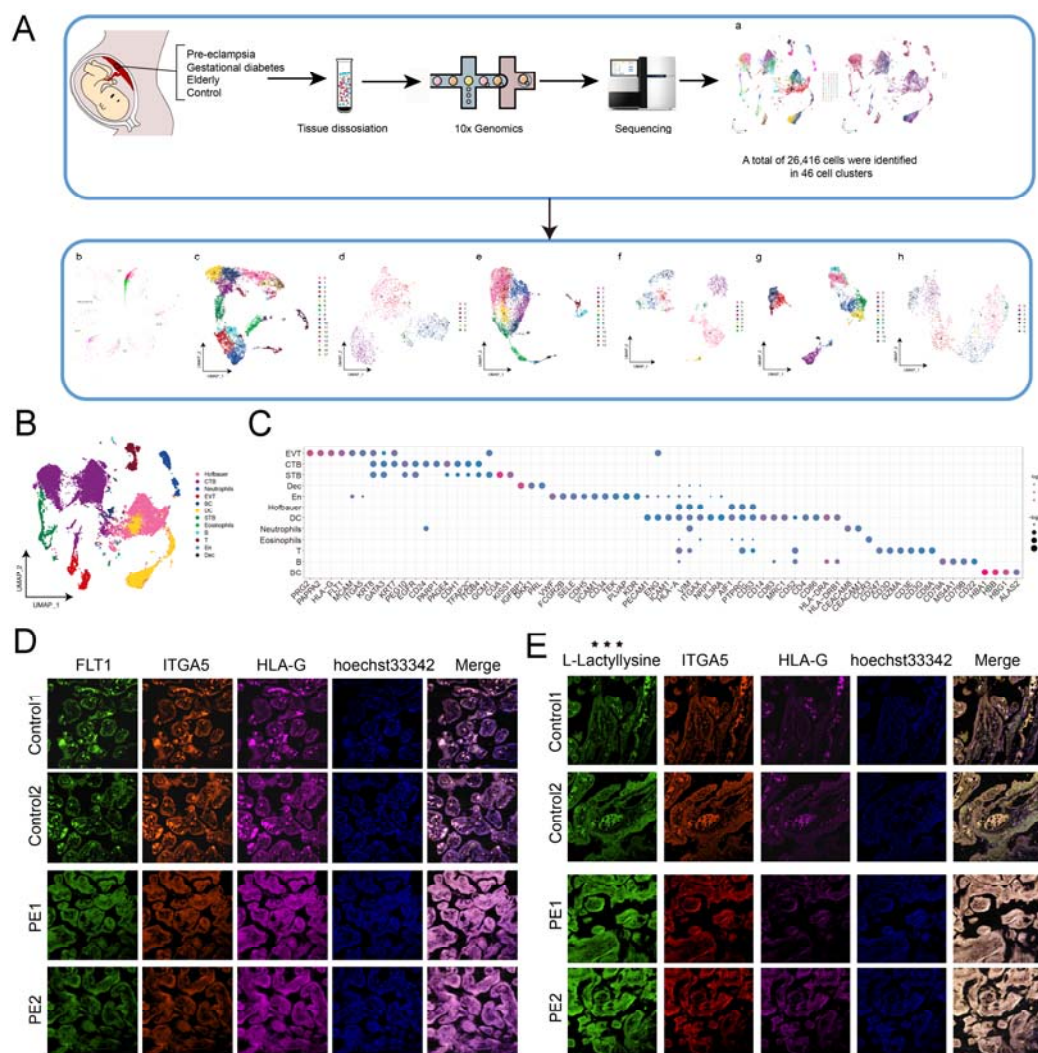

748 **Figure 2. Identification of CTB subpopulations in PE patients and exploration of**  
 749 **the mechanisms involved.** A. Single-cell atlas demonstrating CTB subpopulations. B.  
 750 Changes in the ecological composition of CTB in Controls-PEs. C. Markers of PE  
 751 patients-specific CTB. D. Biological pathways significantly involved in CTB\_CA8  
 752 and CTB\_SGMS2 cell subpopulations. E. Activation or inhibition of cell cycle, HIF-1  
 753 signaling pathway, apoptosis and necroptosis pathways in CTB\_CA8 cell  
 754 subpopulations. F. Flow cytometry experiments to verify apoptosis and necroptosis in  
 755 CTB from PE patients and controls. G. Pseudotime analysis of CTB subpopulations in  
 756 PE patients. H. GRN of CTB cell subpopulations in PE patients. I. CTB  
 757 subpopulation-specific transcription factors in PE patients.

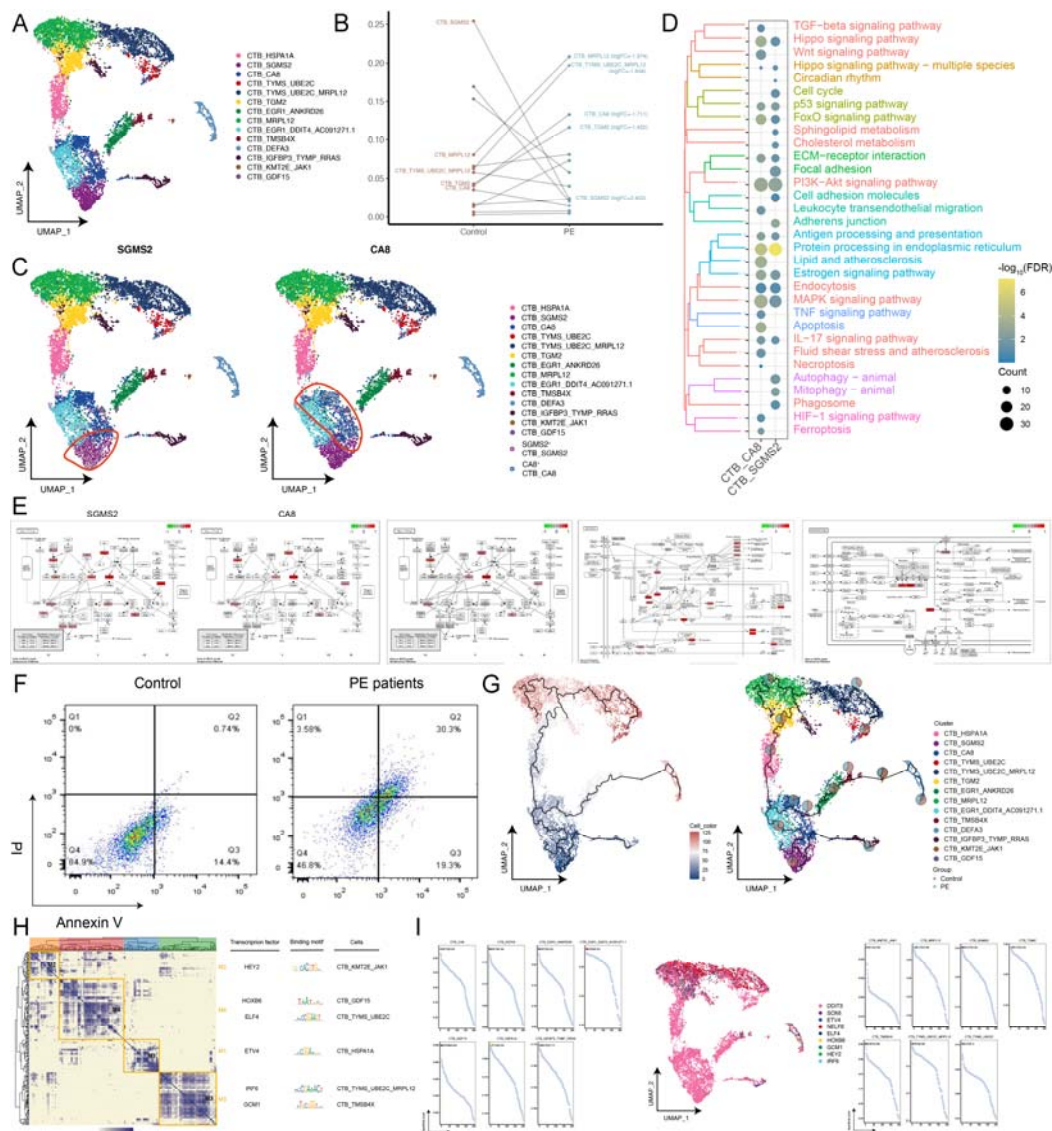

758

759

760 **Figure 3. Identification of EVT subpopulations in PE and exploration of the**  
 761 **mechanisms involved.** A. Single-cell atlas demonstrating EVT cell subpopulations. B.  
 762 Dotted line graph demonstrating EVT cell ecology of control-PE. C. Biological  
 763 pathways significantly involved in EVT\_CSNK2B and EVT\_FUCA1\_FLNB cell  
 764 subsets. D. Series of single-cell atlas-multiple immunofluorescence plots  
 765 demonstrating labeling of PE patients-specific EVT cell subpopulations. E.  
 766 Pseudotime analysis of EVT cell clusters in PE patients. F. GRN of EVT cell  
 767 subpopulations of PE patients. G. EVT cell subpopulation-specific transcription  
 768 factors in PE patients.

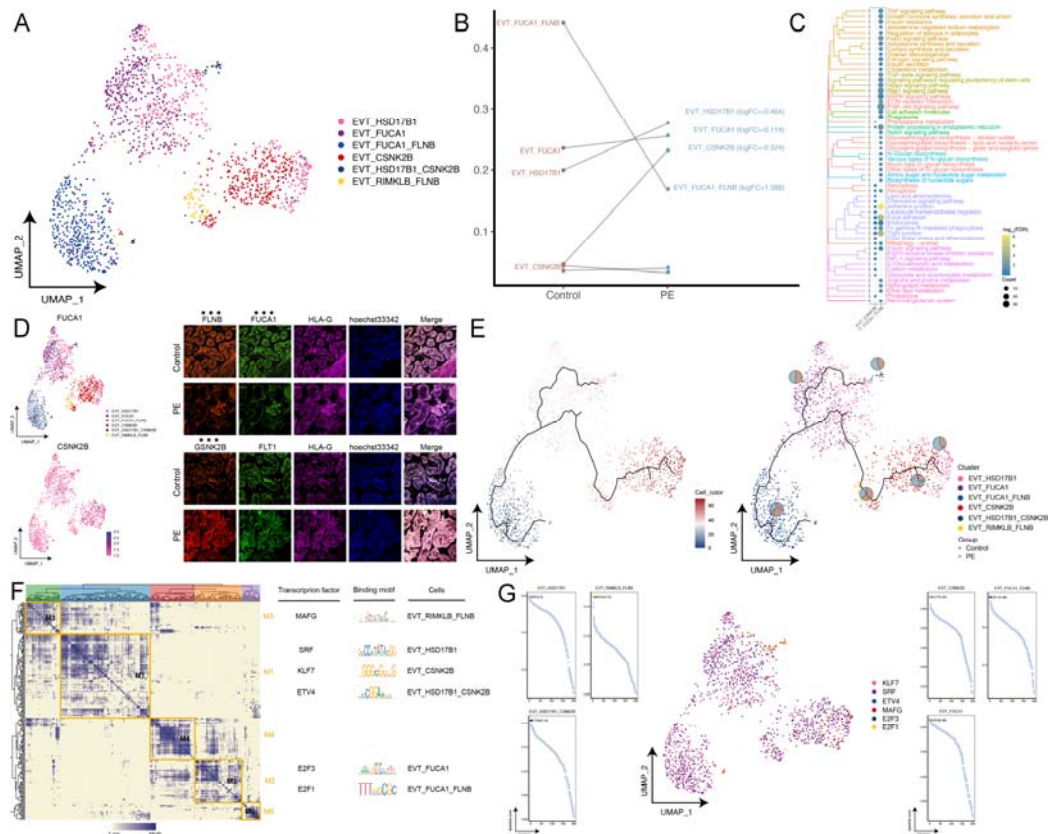

769

770

771 **Figure 4. Inhibition of IGF2BP2 expression causes defective mitochondrial**  
 772 **autophagy and adherent patch signaling in EVT of PE patients.** A.  
 773 EVT\_CSNK2B cell subpopulation significantly inhibits mitochondrial autophagy,  
 774 adherent spots and associated metabolic signaling. B. Network diagram demonstrating  
 775 the regulation of mitochondrial autophagy, adherent spots and related metabolic  
 776 signaling by upstream regulators in EVT\_CSNK2B cell subpopulation. C. Single cell  
 777 profiles demonstrating the expression of IGF2BP2. D-E. Multiplex  
 778 immunofluorescence assays to verify the RNA and protein abundance of IGF2BP2 in  
 779 EVT cells from PE patients and controls.

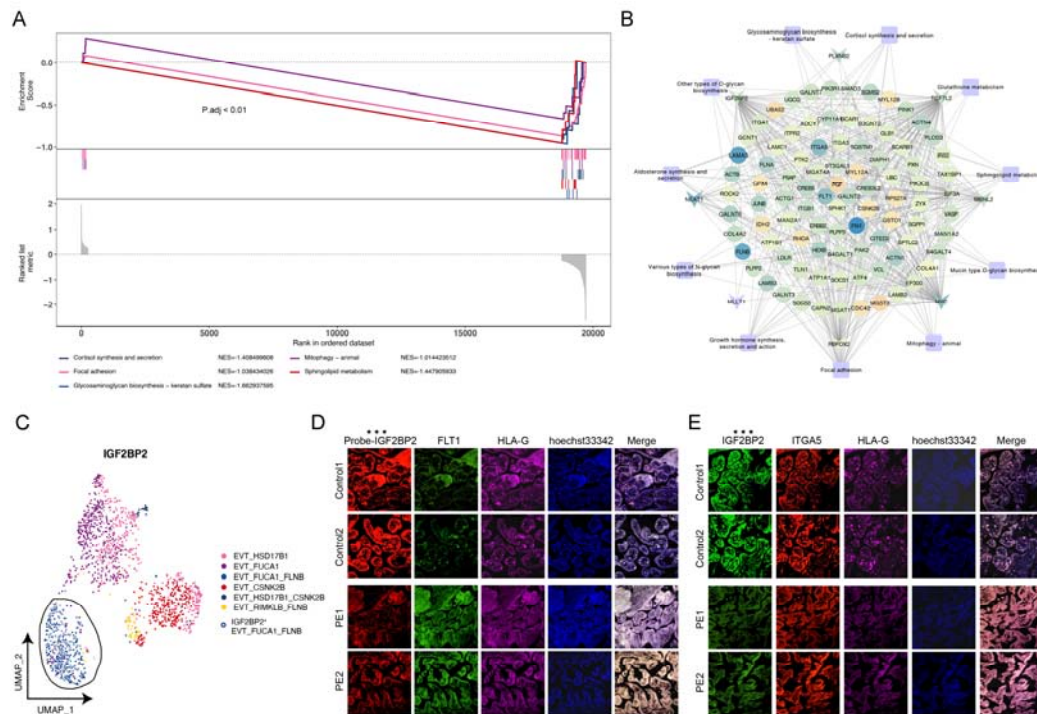

780

781

782 **Figure 5. Hypoxia promotes PTBP1 lactylation leading to PTBP1 inactivation**  
783 **inhibiting the processing of RNA synthesis of IGF2BP2 mediating the disease**  
784 **process of PE patients.** A. Multiplex immunofluorescence assay to verify the protein  
785 abundance of PTBP1 in EVT from PE patients and controls. B. Multiplex  
786 immunofluorescence assay to verify the ability of PTBP1 protein to bind RNA  
787 molecules of IGF2BP2 in PE patients (hyperlactylated) and control (hypolactylated)  
788 EVT. C. Molecular docking predicts the binding site and potential of PTBP1  
789 lactylation modification. D. Molecular docking predicts the binding sites and potential  
790 of PTBP1 protein to IGF2BP2 RNA molecules before and after lactylation. E.  
791 Activation or inhibition of mitochondrial autophagy in EVT\_CSNK2B and  
792 EVT\_FUCA1\_FLNB cell subpopulations. F. Flow cytometry validation of  
793 mitochondrial autophagy in EVT from PE patients and controls. G. Flow cytometry  
794 validation of apoptosis and necrotizing apoptosis in PE patients, control EVT and  
795 HTR-8 cell lines before and after hypoxia treatment. H. Activation or inhibition of  
796 adherent spot signaling in EVT\_CSNK2B and EVT\_FUCA1\_FLNB cell  
797 subpopulations. I. Multiplex immunofluorescence assay to verify the activation or  
798 inhibition of adherent spot signaling in EVT from PE patients and controls. J. Under  
799 normal conditions, PTBP1 protein promotes the processing and synthesis of IGF2BP2,  
800 which in turn promotes the mitochondrial autophagy and adherent patch pathway and  
801 inhibits the apoptotic and necroptotic pathways in EVT. However, lactylation of  
802 PTBP1 protein in EVT under hypoxic microenvironment leads to its inactivation,  
803 which in turn blocks the processing and synthesis of IGF2BP2 RNA, and the  
804 suppressed expression of IGF2BP2 drives the disease process of PE through two  
805 pathways. Pathway 1: Promotes damage depletion of mitochondria and inhibits  
806 mitochondrial autophagy, causing accumulation of damaged mitochondria, inducing  
807 apoptosis and necroptosis of EVT while blocking lactate metabolism and exacerbating  
808 lactate accumulation, forming a feedback vicious inner circle; Pathway 2: Inhibits the  
809 adhesive patch signaling pathway of EVT, weakening the invasive ability of EVT and  
810 leading to insufficient reconstruction of placental spiral vasodilation, forming a  
811 feedback vicious external circulation.



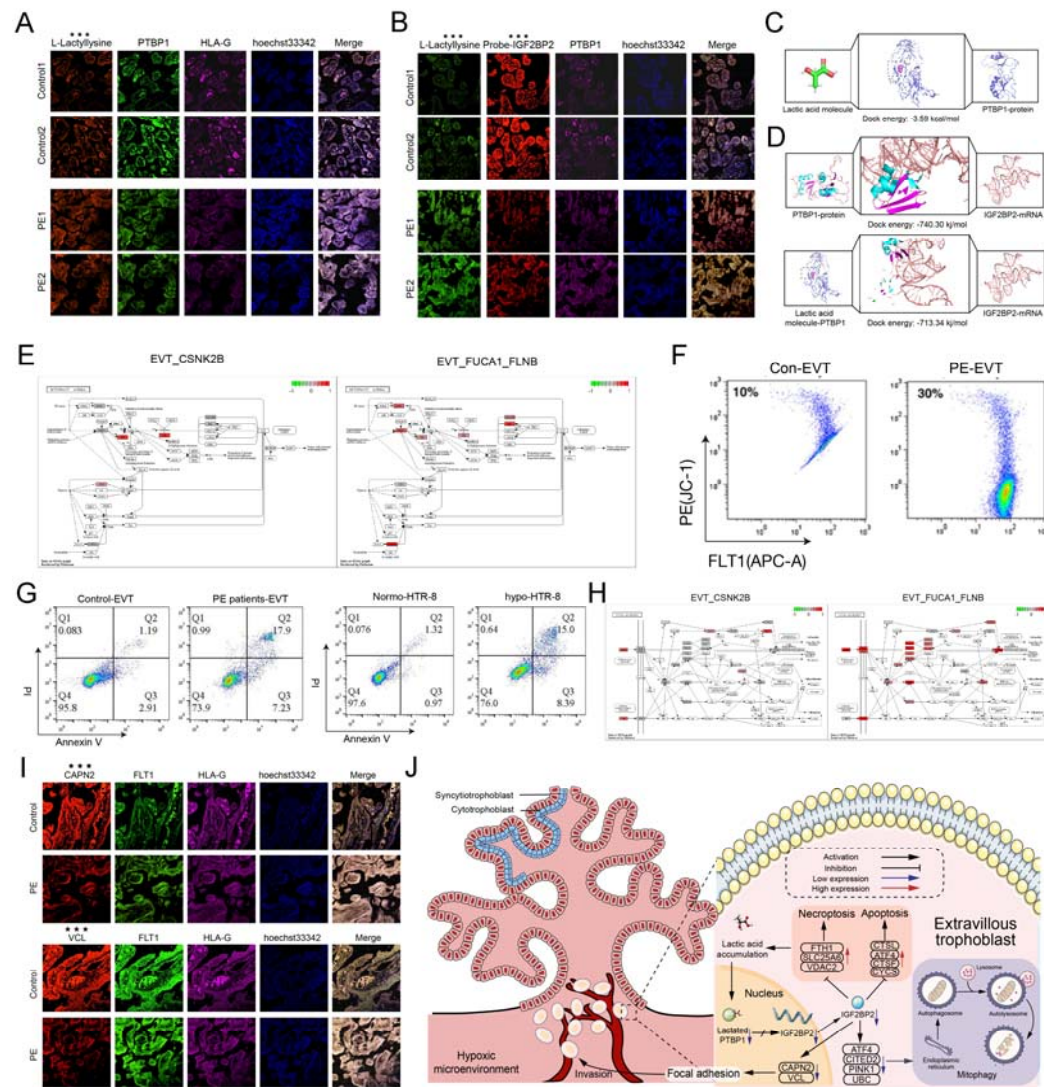

812

813

814 **Figure 6. Exploration of the microenvironmental immune cell ecology of the**  
 815 **placenta of PE patients.** A. Single-cell atlas demonstrating Hofbauer cell  
 816 subpopulations. B. Variation in the ecological composition of Hofbauer cells in  
 817 PEs-Controls. C. Violin diagram demonstrating markers of PE-specific Hofbauer cell  
 818 subpopulations. D. Single-cell plots demonstrating Neutrophils cell subpopulations. E.  
 819 Changes in the ecological composition of Neutrophils cells in PEs-Controls. F. Violin  
 820 diagram showing markers of PE-specific Neutrophils cell subpopulations. G.  
 821 Single-cell plots demonstrating DC cell subpopulations. H. Dotted line diagram  
 822 demonstrating changes in the ecological composition of DC cells in PEs-Controls. I.  
 823 Violin diagram showing markers of PE-specific DC cell subpopulations. J. Single-cell  
 824 mapping demonstrating T cell subpopulations. K. Variation in the ecological  
 825 composition of T cells in PEs-Controls. L. Violin diagram demonstrating markers of  
 826 PE-specific T cell subpopulations.

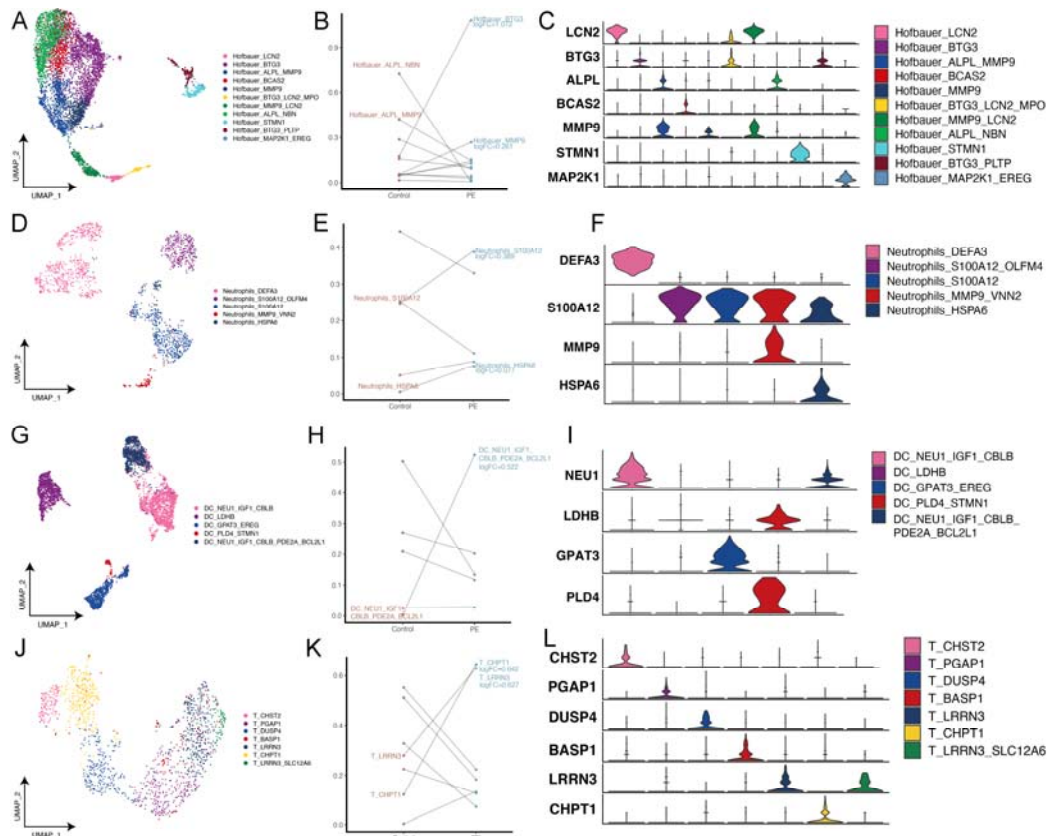

827

828

829 **Figure 7. Interaction of abnormal metabolic signaling of PE patients-specific**  
 830 **EVT subpopulations with microenvironmental immune cells is explored. A.**  
 831 **EVT\_CSNK2B cell subpopulation significantly promotes glutathione**  
 832 **(anti-inflammatory metabolite) metabolism, inhibits sphingolipid (pro-inflammatory**  
 833 **metabolite) metabolism, and suppresses biosynthesis of various glycans**  
 834 **(anti-inflammatory metabolites). B and C. Overview of communication events**  
 835 **between PE patients-specific EVT\_CSNK2B subpopulations and immune cell**  
 836 **subpopulations. D. Immunoinflammatory pathways significantly activated by PE**  
 837 **patient-specific Hofbauer cells. E. Immunoinflammatory pathways significantly**  
 838 **activated by PE patients-specific Neutrophils cells. F. Immunoinflammatory pathway**  
 839 **significantly activated by PE patients-specific DC cells. G. Immunoinflammatory**  
 840 **pathways significantly activated by PE patients-specific T cells.**

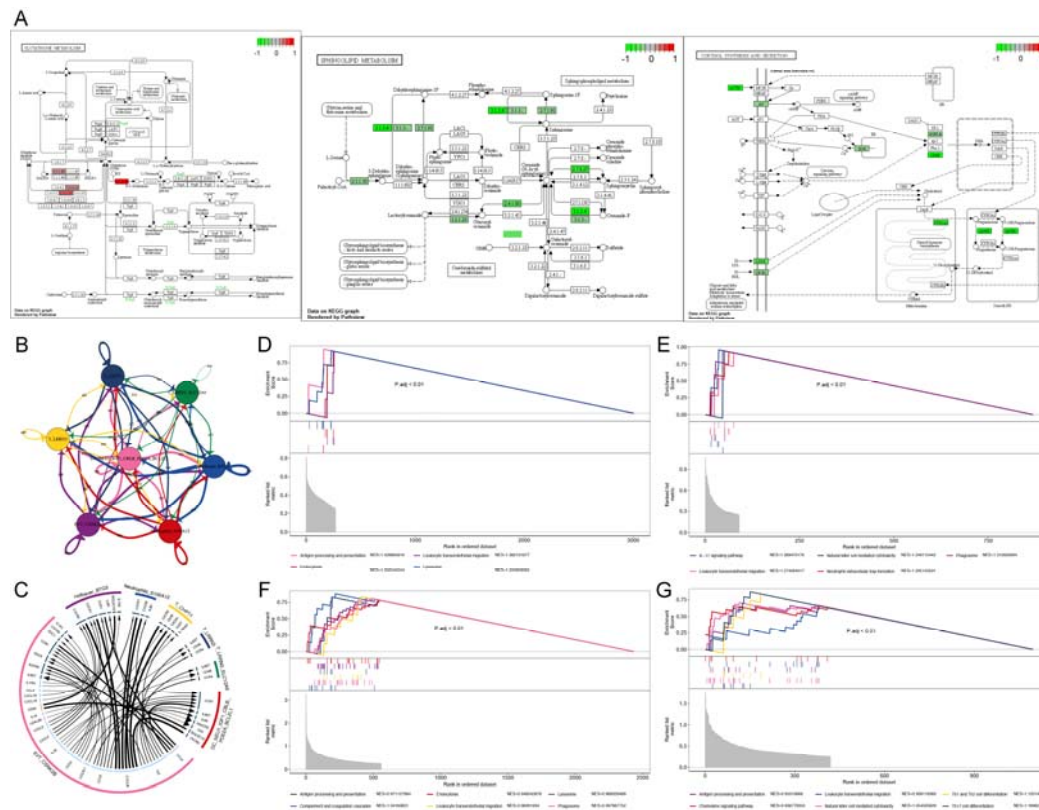

841
